# Supplementary material for: The serendipitous discovery of a readily available redox-bistable molecule derived from cyclic(alkyl)(amino)carbenes
Source: Royal Society of Chemistry journal article supplement (doi:10.1039/c8qo00447a), 2018-01-01
Supplement: c8qo00447a1.pdf [file c8qo00447a1.pdf]

## The Serendipitous Discovery of a Readily Available Redox-Bistable Molecule Derived from Cyclic(alkyl)(amino)carbenes

Janell K. Mahoney,<sup>a,b</sup> Vianney Regnier,<sup>b</sup> Erik Romero,<sup>a</sup> Florian Molton,<sup>b</sup> Guy Royal,<sup>b</sup> Rodolphe Jazzar,<sup>a</sup> David Martin\*<sup>b</sup> and Guy Bertrand\*<sup>a</sup>

<sup>a</sup>UCSD-CNRS Joint Research Laboratory (UMI 3555), Department of Chemistry and Biochemistry, University of California, San Diego, La Jolla, California 92093-0358, United States.

<sup>b</sup>UMR CNRS 5250, Département de Chimie Moléculaire, Université Grenoble-Alpes, CS 40700, 38058 Grenoble cedex 9, France

### SUPPORTING INFORMATION

|                                                                          |     |
|--------------------------------------------------------------------------|-----|
| I. <sup>1</sup> H and <sup>13</sup> C NMR spectra of new compounds ..... | S2  |
| II. X-ray diffraction tables .....                                       | S8  |
| III. Cyclic voltammograms of 1c <sup>2+</sup> .....                      | S11 |
| IV. VT-EPR plots.....                                                    | S12 |
| V. xyz coordinates of optimized computed structures.....                 | S13 |

# I. $^1\text{H}$ and $^{13}\text{C}$ NMR spectra of new compounds

$^1\text{H}$  NMR spectrum of the bis(tetrafluoro)borate salt of **1b** $^{2+}$  ( $\text{CD}_3\text{CN}$ , 500 MHz)

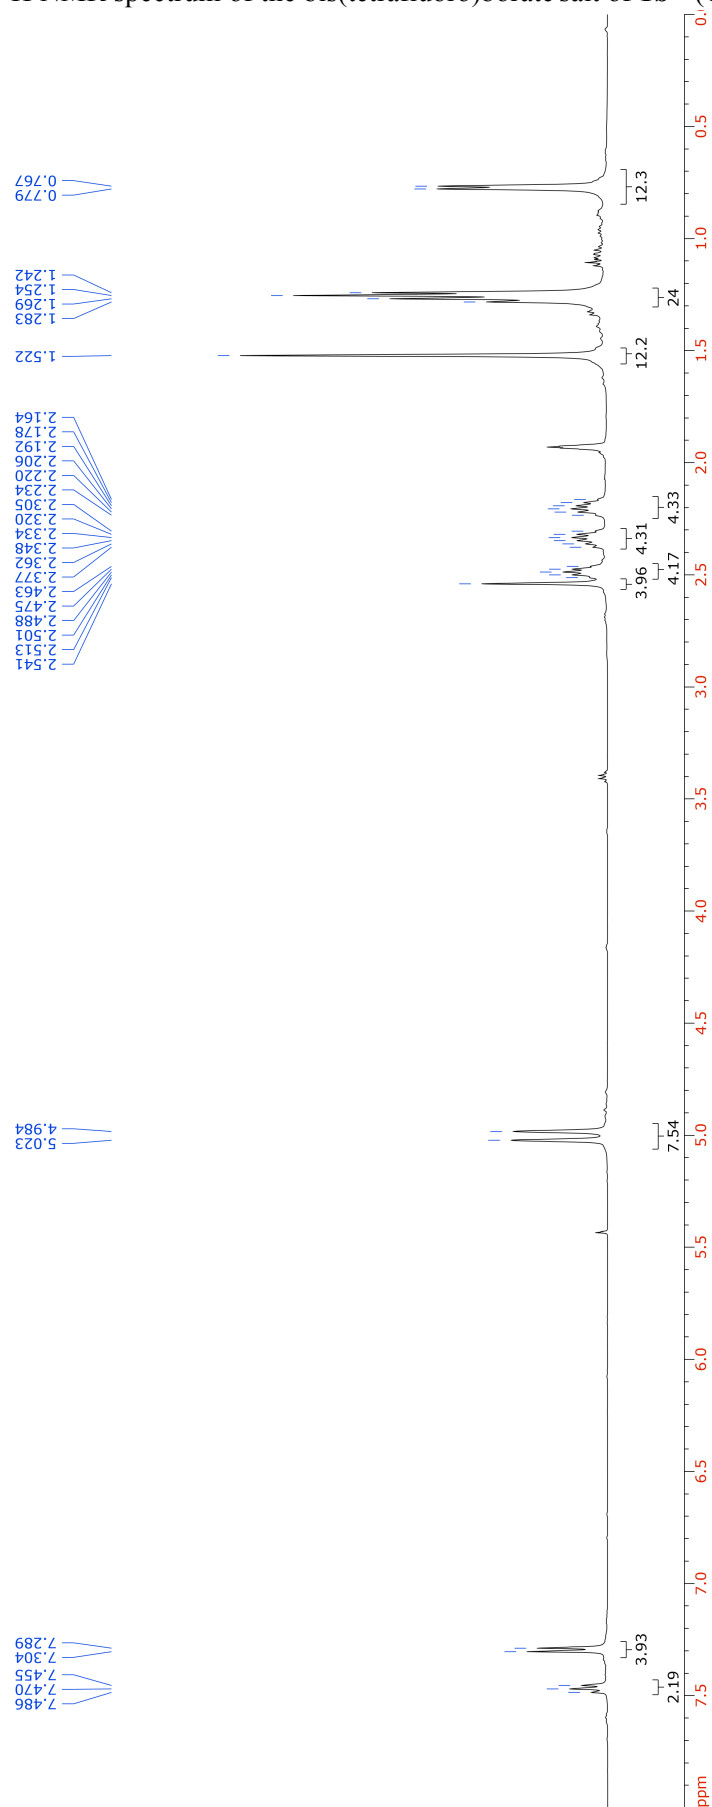

$^{13}\text{C}\{^1\text{H}\}$  NMR spectrum the bis(tetrafluoro)borate salt of **1b**<sup>2+</sup> ( $\text{CD}_3\text{CN}$ , 125 MHz)

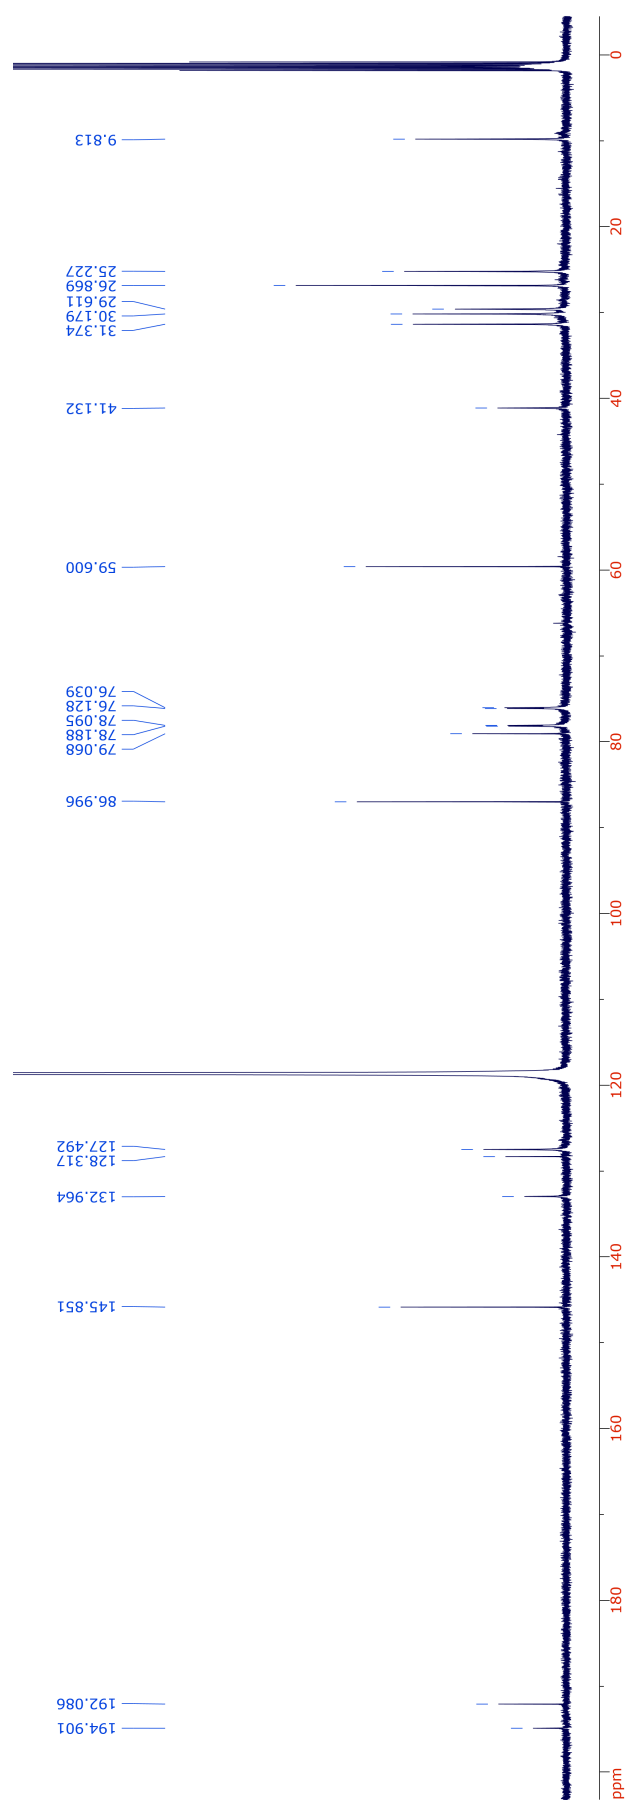

$^1\text{H}$  NMR spectrum of the bis(tetrafluoro)borate salt of **2b**<sup>2+</sup> ( $\text{CDCl}_3$ , 500 MHz)

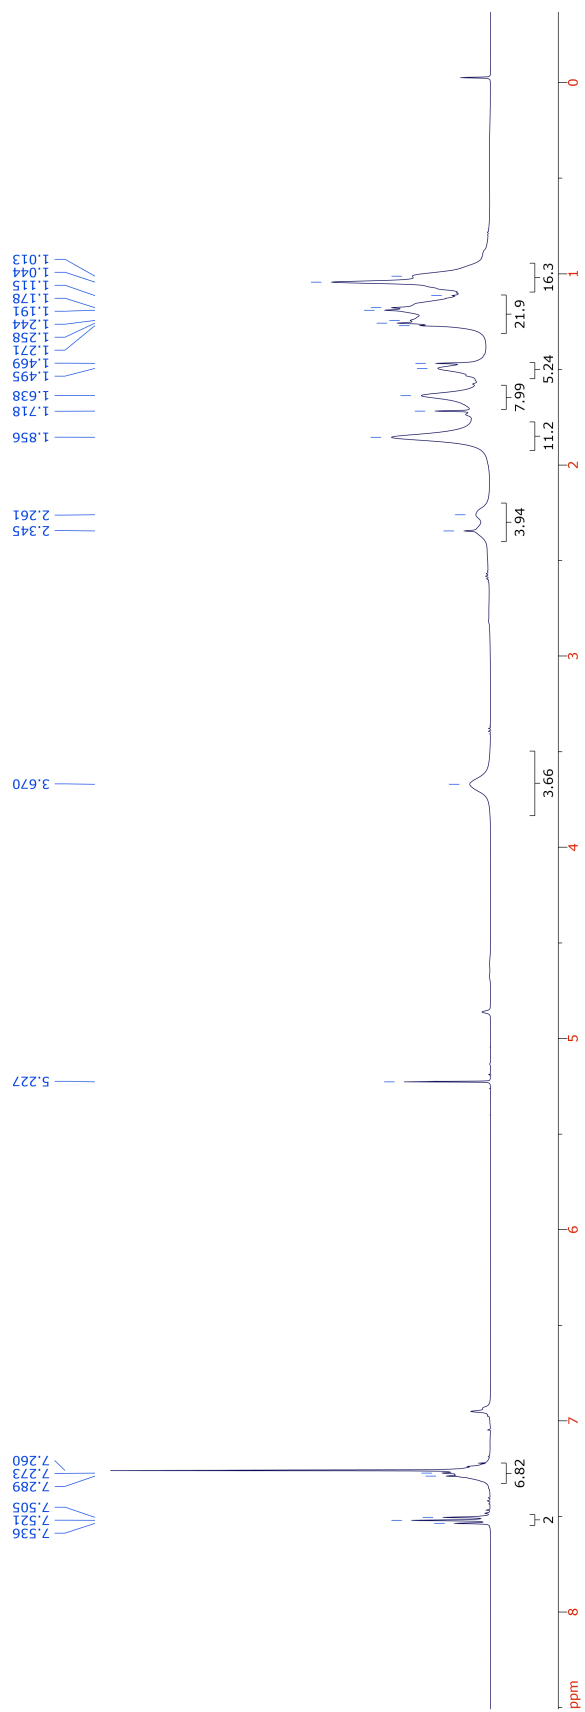

$^{13}\text{C}\{^1\text{H}\}$  NMR spectrum of the bis(tetrafluoro)borate salt of **2b**<sup>2+</sup> ( $\text{CDCl}_3$ , 125 MHz)

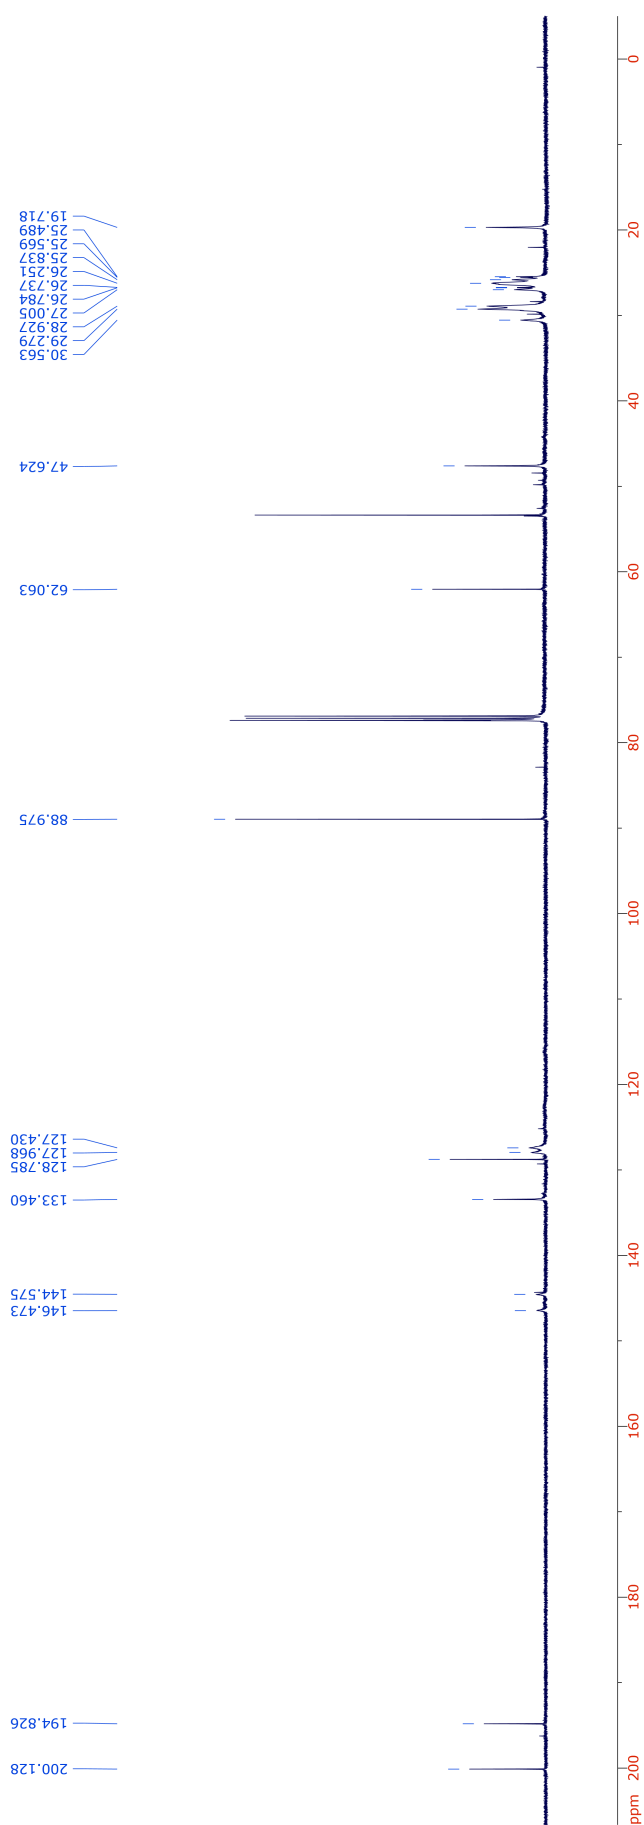

<sup>1</sup>H NMR spectrum of **3c** (CDCl<sub>3</sub>, 300 MHz)

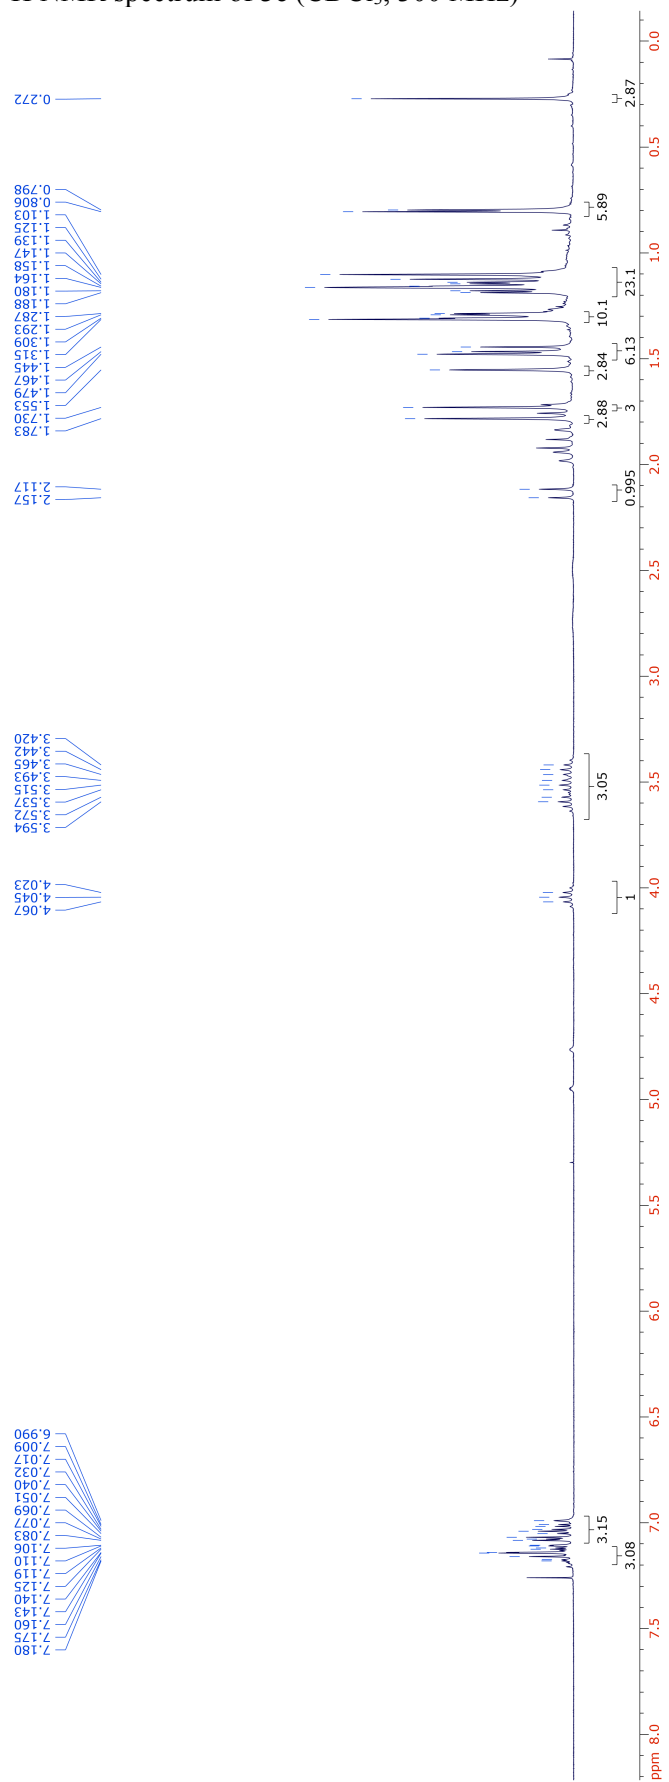

$^{13}\text{C}$  NMR spectrum of **3c** ( $\text{CDCl}_3$ , 125 MHz)

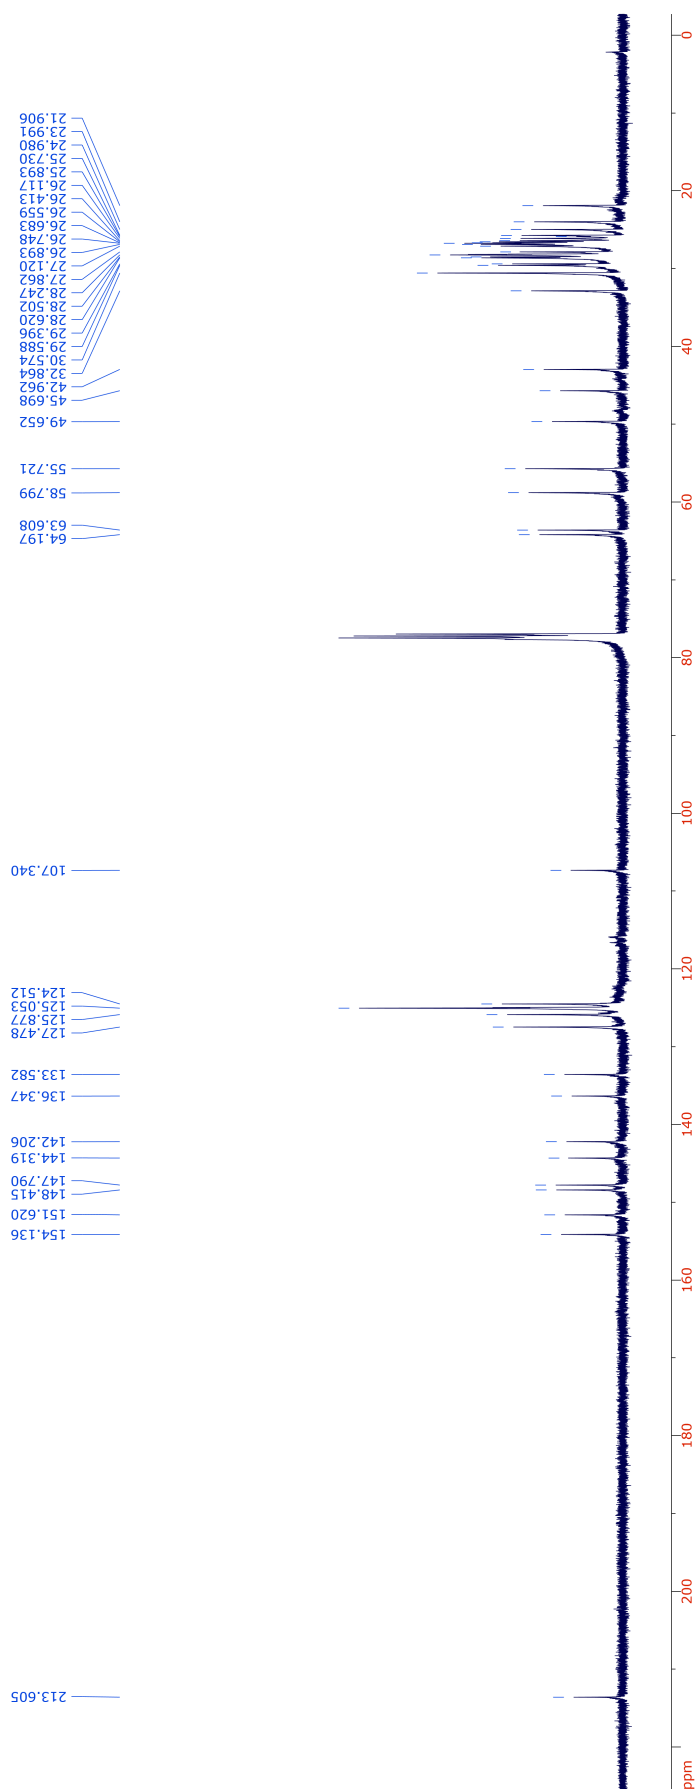

## II. X-ray Diffraction Tables

### X-ray Collection Parameter for $1b^{2+}BF_4^{2-}$

|                                                |                                                    |
|------------------------------------------------|----------------------------------------------------|
| <b>CCDC 1825142</b>                            | Copy_sq                                            |
| Identification code                            |                                                    |
| Empirical formula                              | $C_{56}H_{78}B_2F_8FeN_2O_2$                       |
| Formula weight                                 | 1040.67                                            |
| Temperature/K                                  | 100.0                                              |
| Crystal system                                 | monoclinic                                         |
| Space group                                    | C2/c                                               |
| a/Å                                            | 21.6194(8)                                         |
| b/Å                                            | 10.6383(4)                                         |
| c/Å                                            | 26.8304(10)                                        |
| $\alpha/^\circ$                                | 90                                                 |
| $\beta/^\circ$                                 | 95.299(2)                                          |
| $\gamma/^\circ$                                | 90                                                 |
| Volume/Å <sup>3</sup>                          | 6144.5(4)                                          |
| Z                                              | 4                                                  |
| $\rho_{calc}/\text{g}/\text{cm}^3$             | 1.125                                              |
| $\mu/\text{mm}^{-1}$                           | 0.307                                              |
| F(000)                                         | 2208.0                                             |
| Crystal size/mm <sup>3</sup>                   | 0.2 × 0.1 × 0.1                                    |
| Radiation                                      | MoK $\alpha$ ( $\lambda = 0.71073$ )               |
| 2 $\theta$ range for data collection/ $^\circ$ | 3.048 to 52.854                                    |
| Index ranges                                   | -26 ≤ h ≤ 27, -12 ≤ k ≤ 13, -32 ≤ l ≤ 33           |
| Reflections collected                          | 27629                                              |
| Independent reflections                        | 6295 [ $R_{int} = 0.0468$ , $R_{sigma} = 0.0407$ ] |
| Data/restraints/parameters                     | 6295/0/324                                         |
| Goodness-of-fit on F <sup>2</sup>              | 1.039                                              |
| Final R indexes [ $I \geq 2\sigma(I)$ ]        | $R_1 = 0.0546$ , $wR_2 = 0.1126$                   |
| Final R indexes [all data]                     | $R_1 = 0.0680$ , $wR_2 = 0.1185$                   |
| Largest diff. peak/hole / e Å <sup>-3</sup>    | 0.47/-0.38                                         |

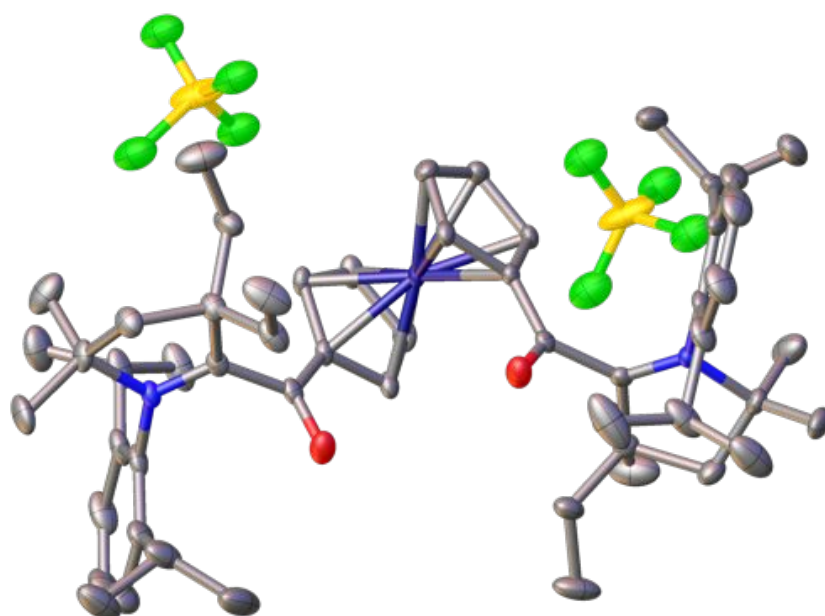



## X-ray Collection Parameter for $1c^{2+}BF_4^{2-}$

### CCDC 1820818

|                                                |                                                               |
|------------------------------------------------|---------------------------------------------------------------|
| Identification code                            | GB_JKM20b_0m_a_sq                                             |
| Empirical formula                              | $C_{47}H_{71}B_2F_8N_3O_2$                                    |
| Formula weight                                 | 883.68                                                        |
| Temperature/K                                  | 100.0                                                         |
| Crystal system                                 | monoclinic                                                    |
| Space group                                    | $P2_1/n$                                                      |
| a/Å                                            | 21.3381(5)                                                    |
| b/Å                                            | 10.2919(3)                                                    |
| c/Å                                            | 24.6126(6)                                                    |
| $\alpha/^\circ$                                | 90                                                            |
| $\beta/^\circ$                                 | 111.6150(10)                                                  |
| $\gamma/^\circ$                                | 90                                                            |
| Volume/Å <sup>3</sup>                          | 5025.1(2)                                                     |
| Z                                              | 4                                                             |
| $\rho_{\text{calc}}/\text{g/cm}^3$             | 1.168                                                         |
| $\mu/\text{mm}^{-1}$                           | 0.753                                                         |
| F(000)                                         | 1888.0                                                        |
| Crystal size/mm <sup>3</sup>                   | $0.13 \times 0.12 \times 0.05$                                |
| Radiation                                      | $\text{CuK}\alpha$ ( $\lambda = 1.54178$ )                    |
| $2\theta$ range for data collection/ $^\circ$  | 4.698 to 136.932                                              |
| Index ranges                                   | $-25 \leq h \leq 23, -12 \leq k \leq 12, -29 \leq l \leq 29$  |
| Reflections collected                          | 58527                                                         |
| Independent reflections                        | 9239 [ $R_{\text{int}} = 0.0548, R_{\text{sigma}} = 0.0328$ ] |
| Data/restraints/parameters                     | 9239/60/615                                                   |
| Goodness-of-fit on $F^2$                       | 1.030                                                         |
| Final R indexes [ $I \geq 2\sigma(I)$ ]        | $R_1 = 0.0515, wR_2 = 0.1361$                                 |
| Final R indexes [all data]                     | $R_1 = 0.0641, wR_2 = 0.1447$                                 |
| Largest diff. peak/hole / $e \text{ \AA}^{-3}$ | 0.54/-0.41                                                    |

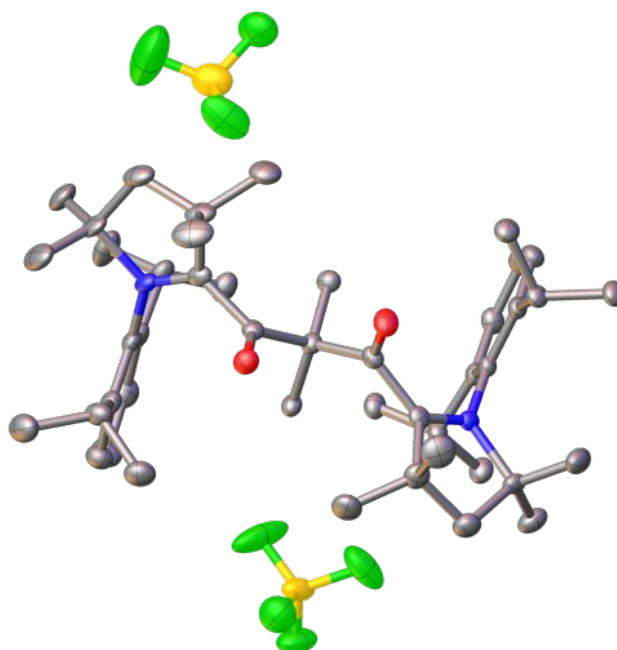

## X-ray Collection Parameter for 3c

### CCDC 1820817

|                                             |                                                               |
|---------------------------------------------|---------------------------------------------------------------|
| Identification code                         | gb_jkm011_0m_a                                                |
| Empirical formula                           | C <sub>45</sub> H <sub>68</sub> N <sub>2</sub> O <sub>2</sub> |
| Formula weight                              | 669.01                                                        |
| Temperature/K                               | 100.0                                                         |
| Crystal system                              | tetragonal                                                    |
| Space group                                 | I4 <sub>1</sub> /a                                            |
| a/Å                                         | 40.9015(14)                                                   |
| b/Å                                         | 40.9015(14)                                                   |
| c/Å                                         | 9.3338(5)                                                     |
| α/°                                         | 90                                                            |
| β/°                                         | 90                                                            |
| γ/°                                         | 90                                                            |
| Volume/Å <sup>3</sup>                       | 15614.8(14)                                                   |
| Z                                           | 16                                                            |
| ρ <sub>calc</sub> /cm <sup>3</sup>          | 1.138                                                         |
| μ/mm <sup>-1</sup>                          | 0.517                                                         |
| F(000)                                      | 5888.0                                                        |
| Crystal size/mm <sup>3</sup>                | 0.31 × 0.2 × 0.12                                             |
| Radiation                                   | CuKα (λ = 1.54178)                                            |
| 2θ range for data collection/°              | 4.32 to 136.492                                               |
| Index ranges                                | -49 ≤ h ≤ 45, -49 ≤ k ≤ 48, -11 ≤ l ≤ 11                      |
| Reflections collected                       | 63703                                                         |
| Independent reflections                     | 7156 [R <sub>int</sub> = 0.0710, R <sub>sigma</sub> = 0.0353] |
| Data/restraints/parameters                  | 7156/0/460                                                    |
| Goodness-of-fit on F <sup>2</sup>           | 1.038                                                         |
| Final R indexes [I ≥ 2σ(I)]                 | R <sub>1</sub> = 0.0390, wR <sub>2</sub> = 0.0921             |
| Final R indexes [all data]                  | R <sub>1</sub> = 0.0530, wR <sub>2</sub> = 0.1006             |
| Largest diff. peak/hole / e Å <sup>-3</sup> | 0.22/-0.18                                                    |

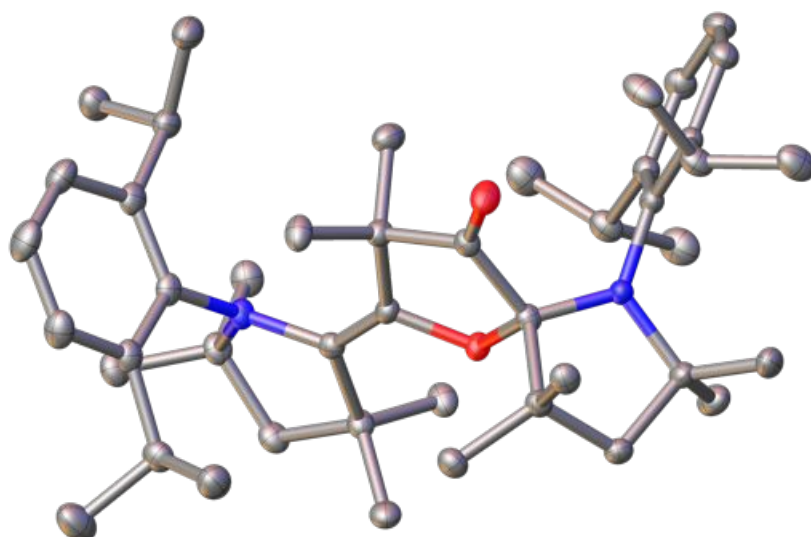

### III. Cyclic Voltammograms of $1c^{2+}$

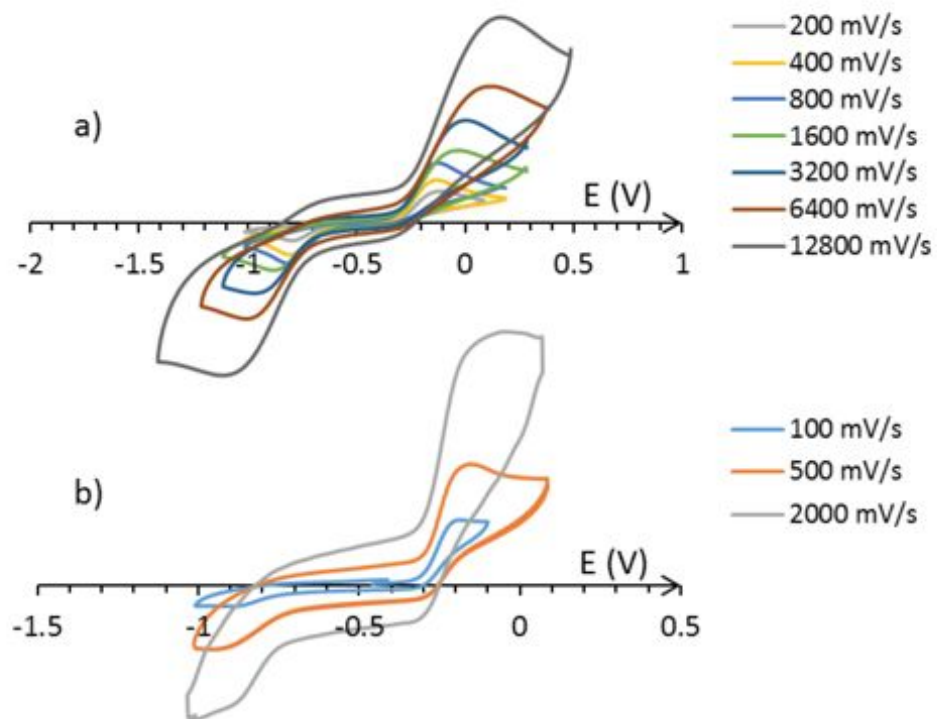

**Figure S1:** Cyclic voltammogram of  $1c^{2+}$  in  $CH_3CN + 0.1M NBu_4PF_6$  at different sweep rates; (a) at room temperature (b) at  $-40\text{ }^\circ\text{C}$ .

## IV. VT-EPR plots

EPR spectra were recorded on a Bruker EMX+ spectrometer equipped with a previously calibrated low-temperature ( $T$ ) measurement device. Samples were approx. 0.01M solution of biradical in frozen acetonitrile.  $I$  is the double integration of the EPR signal (arbitrary unit). When varying temperature, all other acquisition parameters were kept constant. The half-field band ( $\Delta m = \pm 2$ ) was chosen for measurements, due to the saturation of the main  $\Delta m = \pm 1$  transition at low temperature. A “blank” spectrum from a pure frozen acetonitrile sample was subtracted prior to integration, in order to minimize signal from triplet oxygen.

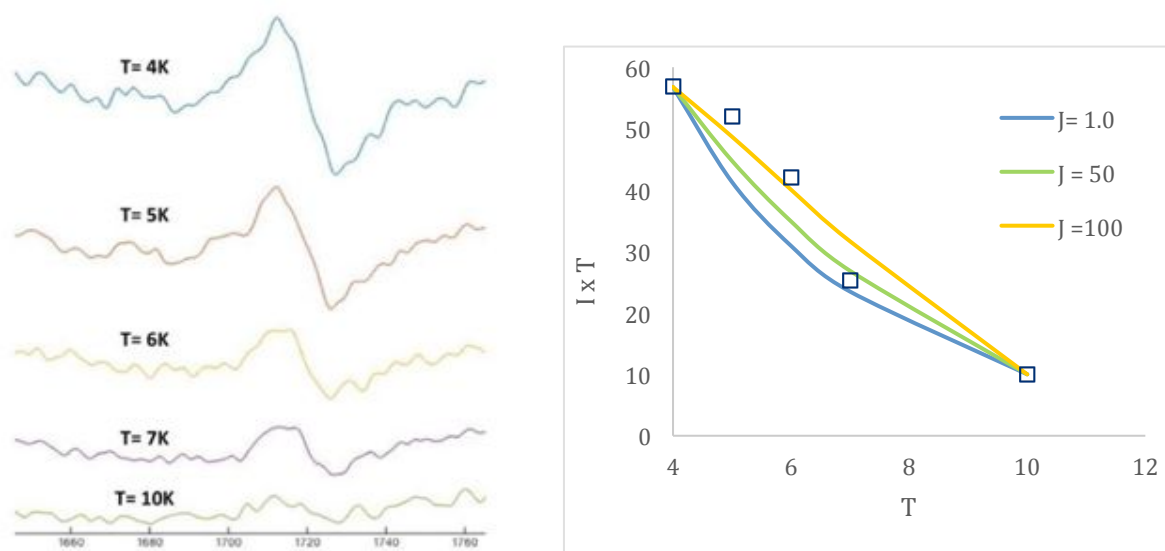

**Figure S2:** Left: half-field EPR band ( $\Delta m = \pm 2$ ) of a solution of **2a** in frozen acetonitrile at different Helium temperature; right:  $I \cdot T$  (arbitrary unit) as a function of temperature  $T$  (K) and fit with  $C/(3+\exp(-J/T/k_B))$ .  $C$  is a proportionality factor,  $-2J$  is the singlet-triplet energy gap ( $\text{J}\cdot\text{mol}^{-1}$ ), and  $R$  is molar gas constant ( $8.314 \text{ J}\cdot\text{mol}^{-1}\cdot\text{K}^{-1}$ ). Any value of  $J < 100 \text{ J}\cdot\text{mol}^{-1}$  could allow for a possible fit.

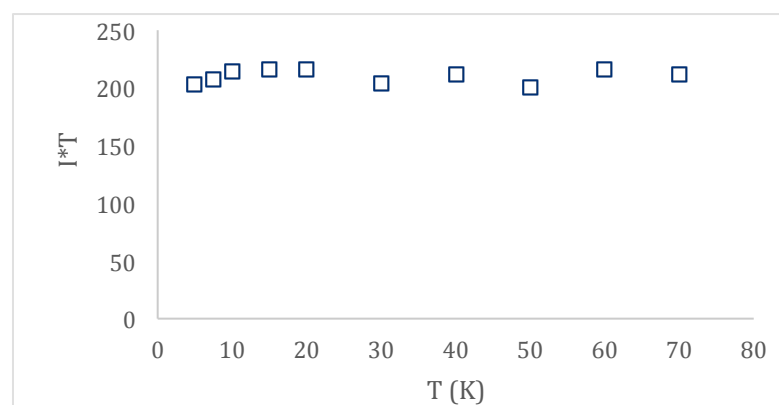

**Figure S3:** ( $I \times T$ ) as a function of  $T$  for a sample of **2b** in frozen acetonitrile.

## V. Computational details

**Computational methods:** We carried out calculations using the density functional theory as implemented in the program package Gaussian09<sup>1</sup> with the 6-311G(d,p) basis set and the B3LYP exchange–correlation functional.<sup>2</sup> Indeed, (amino)(carboxy)radicals, were previously studied at this level of theory and calculations well reproduced experimental data, including geometry from x-ray diffraction studies. All structures were submitted to vibrational analysis and minima were characterized by the absence of imaginary frequencies. Thermodynamic analysis was carried out for a temperature of 298.15 K, using the principal isotope for each element type.

(x,y,z) coordinates of optimized structures are provided below with corresponding zero-point energies in hartrees.

- 
- (1) *Gaussian 09*, Revision 4.2.0, M. J. Frisch, G. W. Trucks, H. B. Schlegel, G. E. Scuseria, M. A. Robb, J. R. Cheeseman, G. Scalmani, V. Barone, B. Mennucci, G. A. Petersson, H. Nakatsuji, M. Caricato, X. Li, H. P. Hratchian, A. F. Izmaylov, J. Bloino, G. Zheng, J. L. Sonnenberg, M. Hada, M. Ehara, K. Toyota, R. Fukuda, J. Hasegawa, M. Ishida, T. Nakajima, Y. Honda, O. Kitao, H. Nakai, T. Vreven, J. A. Montgomery Jr., J. E. Peralta, F. Ogliaro, M. Bearpark, J. J. Heyd, E. Brothers, K. N. Kudin, V. N. Staroverov, R. Kobayashi, J. Normand, K. Raghavachari, A. Rendell, J. C. Burant, S. S. Iyengar, J. Tomasi, M. Cossi, N. Rega, N. J. Millam, M. Klene, J. E. Knox, J. B. Cross, V. Bakken, C. Adamo, J. Jaramillo, R. Gomperts, R. E. Stratmann, O. Yazyev, A. J. Austin, R. Cammi, C. Pomelli, J. W. Ochterski, R. L. Martin, K. Morokuma, V. G. Zakrzewski, G. A. Voth, P. Salvador, J. J. Dannenberg, S. Dapprich, A. D. Daniels, O. Farkas, J. B. Foresman, J. V. Ortiz, J. Cioslowski and D. J. Fox, Gaussian, Inc., Wallingford CT, 2009.
- (2) (a) A. D. Becke, *J. Chem. Phys.*, 1993, **98**, 5648. (b) C. Lee, W. Yang and R. G. Parr, *Phys. Rev. B*, 1988, **37**, 785. (c) S. H. Vosko, L. Wilk and M. Nusair, *Can. J. Phys.*, 1980, **58**, 1200. (d) P. J. Stephens, F. J. Devlin, C. F. Chabalowski and M. J. Frisch, *J. Phys. Chem.*, 1994, **98**, 11623.

**xyz coordinate of I (UB3LYP/6-311g\*\* level of theory)**

(E = -208.554901)

|   | x           | y           | z           |   | x           | y           | z           |
|---|-------------|-------------|-------------|---|-------------|-------------|-------------|
| O | -1.36468100 | -0.63011600 | 0.00180600  | H | 1.05704400  | 1.62710700  | 0.00361400  |
| N | 1.36232400  | -0.44684900 | -0.01551500 | H | 0.88725900  | -1.33864200 | 0.01943800  |
| C | 0.58143400  | 0.65519800  | 0.00117800  | H | 2.36238500  | -0.40886100 | 0.06123500  |
| C | -0.83051500 | 0.49027200  | 0.00051300  | H | -1.43101500 | 1.41644900  | -0.00027200 |

**xyz coordinate of I<sub>OO</sub> (B3LYP/6-311g\*\* level of theory)**

(E = -417.059602)

|   | x          | y           | z           |   | x           | y           | z           |
|---|------------|-------------|-------------|---|-------------|-------------|-------------|
| O | 0.67317400 | -0.30452800 | 0.88235500  | O | -0.67331900 | -0.30647500 | -0.88204700 |
| C | 1.84581900 | -0.51460700 | 0.49490400  | C | -1.84589200 | -0.51570200 | -0.49394700 |
| C | 2.71445700 | 0.50463300  | 0.09330100  | C | -2.71441300 | 0.50443300  | -0.09432900 |
| N | 4.01298500 | 0.30488000  | -0.27067000 | H | -2.35944900 | 1.52771400  | -0.10906100 |
| H | 2.35954300 | 1.52796300  | 0.10580600  | N | -4.01280200 | 0.30549700  | 0.27045500  |
| H | 2.24004000 | -1.54991500 | 0.42392400  | H | -4.32909000 | -0.63644500 | 0.44617000  |
| H | 4.50908500 | 1.03001200  | -0.76102300 | H | -4.50903300 | 1.03182800  | 0.75887100  |
| H | 4.32909600 | -0.63747600 | -0.44452700 | H | -2.24014000 | -1.55084100 | -0.42069400 |

**xyz coordinate of I<sub>CC</sub> (B3LYP/6-311g\*\* level of theory)**

(E = -417.146248)

|   | x           | y           | z           |   | x           | y           | z           |
|---|-------------|-------------|-------------|---|-------------|-------------|-------------|
| C | 0.36489100  | -0.59670700 | 0.32859600  | O | -2.49736200 | -0.43686500 | 0.24351700  |
| C | 1.88424800  | -0.48504700 | 0.23672400  | H | -0.11921100 | 1.97569400  | 1.17469500  |
| O | 2.49732000  | 0.43693900  | -0.24339200 | H | -0.94430800 | -2.13292900 | 0.06038100  |
| H | 0.13183500  | -0.59017500 | 1.40398600  | H | 0.94436800  | 2.13284100  | -0.06057800 |
| H | 0.11936100  | -1.97569800 | -1.17480100 | N | 0.02319600  | -1.93038700 | -0.16444700 |
| C | -0.36491400 | 0.59666000  | -0.32863500 | N | -0.02312600 | 1.93034300  | 0.16433500  |
| H | -0.13192000 | 0.59008000  | -1.40403900 | H | -2.40258700 | 1.38443700  | -0.62730600 |
| C | -1.88427000 | 0.48507200  | -0.23666800 | H | 2.40258400  | -1.38441100 | 0.62733600  |

**xyz coordinate of I<sub>CO</sub> (B3LYP/6-311g\*\* level of theory)**

(E = -417.125093)

|   | x           | y           | z           |   | x           | y           | z           |
|---|-------------|-------------|-------------|---|-------------|-------------|-------------|
| C | 1.48078100  | 0.95600800  | -0.43532900 | H | -2.33402000 | 0.21686700  | -1.39127900 |
| C | 1.27105500  | -0.56394600 | -0.42234600 | H | 1.84977900  | -0.96260700 | -1.26880600 |
| O | 2.21748900  | 1.53262100  | 0.32214100  | H | 0.91212200  | 1.48351200  | -1.22525300 |
| N | 1.65144200  | -1.10554900 | 0.84770200  | H | 2.09972600  | -2.00819000 | 0.77534500  |
| O | -0.07428600 | -0.86681500 | -0.80129100 | H | 2.24613400  | -0.45262800 | 1.34742900  |
| C | -1.03757700 | -0.44833800 | 0.10781800  | H | -0.80255500 | -0.63183700 | 1.15091000  |
| C | -2.18337400 | 0.08342900  | -0.32496000 | H | -4.14495400 | 0.36192200  | 0.12155800  |
| N | -3.22293900 | 0.56615900  | 0.48374900  | H | -3.15668300 | 0.27931900  | 1.45203600  |

**xyz coordinate of 2c (triplet state at the B3LYP/6-311g\*\* level of theory)**  
(E = -2015.083898)

|   | x           | y           | z           |   | x           | y           | z           |
|---|-------------|-------------|-------------|---|-------------|-------------|-------------|
| C | 1.19963000  | 1.16042500  | -0.69482900 | H | 4.44781400  | 4.23730200  | 0.56902300  |
| O | 0.89298500  | 0.11809300  | -1.28530500 | C | 5.77345400  | 0.47466800  | 0.70348100  |
| C | -0.00171600 | 2.13068600  | -0.38890200 | H | 5.74809300  | -0.54381200 | 1.09425800  |
| C | -1.11535900 | 1.21926500  | 0.26429700  | H | 6.80989500  | 0.70609900  | 0.44373000  |
| O | -0.73448200 | 0.25253000  | 0.92981000  | H | 5.46938500  | 1.15467500  | 1.49596700  |
| C | -2.56840100 | 1.43990600  | 0.15193400  | C | 5.53488300  | -0.30877000 | -1.62812900 |
| C | -3.37861900 | 2.71991100  | 0.47365600  | H | 6.53716700  | 0.06439800  | -1.85894300 |
| C | -4.82643400 | 0.70789600  | 0.64924700  | H | 5.63743600  | -1.33305700 | -1.26951600 |
| C | -4.82872100 | 2.20749100  | 0.32919700  | H | 4.95184600  | -0.31049000 | -2.54853300 |
| H | -5.14802100 | 2.34899200  | -0.70758400 | C | 3.08870300  | -1.02247400 | 0.24686500  |
| H | -5.52110900 | 2.76437900  | 0.96454600  | C | 2.89530100  | -2.15704400 | -0.58385100 |
| N | -3.41143400 | 0.33660800  | 0.28406800  | C | 2.99726700  | -1.15240900 | 1.65789600  |
| C | -3.10911800 | -1.00813700 | -0.17951600 | C | 2.71128200  | -3.40225800 | 0.02679600  |
| C | -2.87657600 | -2.05680300 | 0.74425400  | C | 2.78794800  | -2.42185000 | 2.20489800  |
| C | -3.13869300 | -1.28482600 | -1.57109700 | C | 2.66920100  | -3.54576900 | 1.40393200  |
| C | -2.74839300 | -3.36158100 | 0.25746300  | H | 2.57051000  | -4.27580000 | -0.59889100 |
| C | -2.99531800 | -2.60920100 | -1.99628800 | H | 2.71568200  | -2.52690300 | 3.28104600  |
| C | -2.81875200 | -3.64699600 | -1.09607400 | H | 2.52068100  | -4.52352100 | 1.84932700  |
| H | -2.57350500 | -4.16811500 | 0.95968200  | C | -3.26477800 | -0.22330200 | -2.66296800 |
| H | -3.01895200 | -2.82686700 | -3.05760100 | C | -4.45337000 | -0.46415400 | -3.61576200 |
| H | -2.71788200 | -4.66777600 | -1.44835800 | C | -1.96169700 | -0.15376800 | -3.48581400 |
| C | -5.87348000 | -0.03581000 | -0.18748400 | H | -3.40509200 | 0.74627500  | -2.18287300 |
| H | -5.75966400 | 0.17205400  | -1.24956300 | H | -5.40341600 | -0.56598700 | -3.08849700 |
| H | -5.82114600 | -1.11530400 | -0.03594900 | H | -4.54390700 | 0.36921400  | -4.31933000 |
| H | -6.86880700 | 0.30032200  | 0.11638500  | H | -4.30983100 | -1.37292100 | -4.20657800 |
| C | -5.14861400 | 0.44718300  | 2.13552700  | H | -1.08645700 | -0.06407500 | -2.84244200 |
| H | -5.24418600 | -0.61744100 | 2.33565100  | H | -1.83699100 | -1.05844400 | -4.08820200 |
| H | -4.39584300 | 0.85371900  | 2.80810200  | H | -1.98946300 | 0.69808700  | -4.17301000 |
| H | -6.10746800 | 0.91510900  | 2.37744300  | C | -2.70221800 | -1.86384000 | 2.24766100  |
| C | -3.23767900 | 3.95042600  | -0.44326100 | C | -1.28063000 | -2.26084100 | 2.69297100  |
| H | -4.00236800 | 4.68017400  | -0.15686600 | C | -3.73234100 | -2.66917500 | 3.06717900  |
| H | -2.27258300 | 4.44768600  | -0.35111200 | H | -2.82161400 | -0.80346500 | 2.46310000  |
| H | -3.40318900 | 3.69607900  | -1.49230000 | H | -0.53072300 | -1.72706400 | 2.11513400  |
| C | -3.09906200 | 3.18708400  | 1.92910600  | H | -1.14252000 | -2.02249100 | 3.75283600  |
| H | -3.11661700 | 2.36310700  | 2.64076800  | H | -1.11596400 | -3.33596600 | 2.57301500  |
| H | -2.12153700 | 3.66129500  | 2.01425900  | H | -4.75916900 | -2.51667800 | 2.72818700  |
| H | -3.85073600 | 3.92177100  | 2.23535700  | H | -3.52991200 | -3.74221800 | 3.00331900  |
| C | 0.30474800  | 3.24625500  | 0.62403700  | H | -3.67874200 | -2.39065400 | 4.12409800  |
| H | -0.58239300 | 3.84921500  | 0.81304300  | C | 3.06893200  | 0.01992900  | 2.63638700  |
| H | 0.63863000  | 2.83118900  | 1.57722100  | C | 4.12217300  | -0.17972500 | 3.74381800  |
| H | 1.06524900  | 3.93079000  | 0.25751200  | C | 1.69172100  | 0.29169100  | 3.27233700  |
| C | -0.41906200 | 2.70831200  | -1.75884000 | H | 3.33866900  | 0.91071200  | 2.07377000  |
| H | -0.46119000 | 1.91328900  | -2.49966600 | H | 5.11079200  | -0.40939000 | 3.34283300  |
| H | -1.38920100 | 3.19067400  | -1.72874900 | H | 4.20370400  | 0.72798300  | 4.35006100  |
| H | 0.30483200  | 3.44977700  | -2.10137700 | H | 3.84186000  | -0.99291800 | 4.41851200  |
| C | 2.61656600  | 1.37854900  | -0.38958800 | H | 0.92085800  | 0.41949100  | 2.51258000  |
| C | 3.48098500  | 2.64906300  | -0.55540500 | H | 1.38884500  | -0.53964900 | 3.91582700  |
| C | 4.90391300  | 0.59434400  | -0.56132700 | H | 1.73590000  | 1.19218100  | 3.89471700  |
| C | 4.80236300  | 2.03335000  | -1.08292200 | C | 2.77951400  | -2.12145200 | -2.10858200 |
| H | 5.67002600  | 2.63276900  | -0.79750200 | C | 1.36937100  | -2.56862400 | -2.55181600 |
| H | 4.76623800  | 2.00936000  | -2.17542300 | C | 3.81927500  | -3.00908500 | -2.82338000 |
| N | 3.45274900  | 0.26871000  | -0.31834900 | H | 2.90215200  | -1.08702500 | -2.42725300 |
| C | 2.99002200  | 3.64882700  | -1.62096900 | H | 0.59925200  | -2.00959500 | -2.02786700 |
| H | 3.80244400  | 4.34364100  | -1.85670600 | H | 1.24961800  | -2.40268800 | -3.62750100 |
| H | 2.70880600  | 3.13575400  | -2.54325300 | H | 1.22035700  | -3.63660700 | -2.36496700 |
| H | 2.14368900  | 4.25048900  | -1.29292900 | H | 4.84796700  | -2.77261800 | -2.55195300 |
| C | 3.75193800  | 3.41453600  | 0.76446500  | H | 3.65443700  | -4.06627400 | -2.59626900 |
| H | 2.84464200  | 3.84042800  | 1.18872900  | H | 3.72320000  | -2.89392700 | -3.90758300 |
| H | 4.20134300  | 2.77761700  | 1.52543400  |   |             |             |             |

xyz coordinate of 3c (B3LYP/6-311g\*\* level of theory)  
(E= -2015.129391)

|   | x           | y           | z           |   | x           | y           | z           |
|---|-------------|-------------|-------------|---|-------------|-------------|-------------|
| O | -0.69316000 | 0.72651500  | 0.66842100  | C | 2.96658700  | 3.28010600  | -1.59767800 |
| C | 0.18808900  | -0.54191600 | -1.13310400 | C | 4.81883800  | 3.16504100  | 0.09957600  |
| C | -1.77272100 | 0.85250100  | -0.34858400 | H | 2.91254000  | 2.19464100  | 0.23482100  |
| C | -3.09573900 | 2.78922800  | 0.38586500  | H | 2.15553100  | 2.75346300  | -2.10233600 |
| C | -3.96202600 | 1.51928200  | 0.43118100  | H | 2.54872700  | 4.17600900  | -1.12937000 |
| H | -4.42876600 | 1.38612400  | 1.41238100  | H | 3.67407500  | 3.61078100  | -2.36301900 |
| H | -4.77162300 | 1.57405800  | -0.30646600 | H | 5.30008600  | 2.59703300  | 0.89775400  |
| C | 0.50771400  | 0.18523600  | 0.16619700  | H | 5.58492000  | 3.40493500  | -0.64320200 |
| C | 1.64738600  | 0.90233800  | 2.35342200  | H | 4.46403600  | 4.10806100  | 0.52715300  |
| C | 3.10479900  | 0.66681100  | 2.79729900  | C | 3.79824300  | -2.80941400 | -0.72820500 |
| C | 3.64929100  | -0.50209800 | 1.96161900  | C | 4.98701500  | -3.62466000 | -0.17917000 |
| H | 3.70447500  | 1.55557800  | 2.58170600  | C | 3.15211100  | -3.61206900 | -1.87833400 |
| H | 3.17769200  | 0.47789000  | 3.87134800  | H | 3.05821700  | -2.70489700 | 0.06488800  |
| C | 1.63215100  | 0.28457700  | 0.91993600  | H | 5.47976900  | -3.13932600 | 0.66391500  |
| N | 2.92344700  | -0.30420800 | 0.65079500  | H | 4.64759400  | -4.61014100 | 0.15453100  |
| C | -2.48614400 | 3.05017300  | 1.77767500  | H | 5.74372400  | -3.78265600 | -0.95326300 |
| H | -1.83587400 | 3.92812700  | 1.77108200  | H | 2.32834500  | -3.07447900 | -2.34758100 |
| H | -3.28898700 | 3.24519000  | 2.49479700  | H | 3.88192600  | -3.84633300 | -2.65799900 |
| H | -1.90934500 | 2.19983400  | 2.13637300  | H | 2.76252700  | -4.56187900 | -1.49959900 |
| C | -3.93559600 | 4.02059700  | 0.00782600  | C | -2.01161100 | 2.38906300  | -0.69554400 |
| H | -4.65935100 | 4.22936900  | 0.80150600  | C | -2.57965100 | 2.57569300  | -2.12027700 |
| H | -3.30875500 | 4.91097900  | -0.09868600 | H | -1.90621500 | 2.16742000  | -2.87239600 |
| H | -4.49499900 | 3.88469200  | -0.91835900 | H | -3.55416300 | 2.11240000  | -2.26839800 |
| C | 0.67443100  | 0.19930500  | 3.32183700  | H | -2.68683300 | 3.64358900  | -2.32145800 |
| H | -0.35553700 | 0.36629600  | 3.01957300  | C | -0.72971300 | 3.22516700  | -0.62828800 |
| H | 0.84220300  | -0.87459800 | 3.37230200  | H | -0.18654700 | 3.09936100  | 0.30126500  |
| H | 0.80625100  | 0.60708900  | 4.32965200  | H | -0.05763400 | 2.96102800  | -1.44798700 |
| C | 1.33103100  | 2.41046700  | 2.42259600  | H | -0.97589300 | 4.28463500  | -0.74641100 |
| H | 1.52761100  | 2.76859800  | 3.43891500  | N | -3.04826200 | 0.41190700  | 0.13293600  |
| H | 1.94776200  | 3.00008200  | 1.74268000  | C | -3.56979600 | -0.93891400 | 0.16378700  |
| H | 0.28442400  | 2.60389900  | 2.20145300  | C | -3.39524300 | -1.73246400 | 1.32755400  |
| C | 5.17470400  | -0.39503000 | 1.85577600  | C | -4.35796800 | -1.44176500 | -0.90707300 |
| H | 5.59537400  | -0.48094300 | 2.86179900  | C | -3.92611200 | -3.02594300 | 1.35793900  |
| H | 5.61068300  | -1.18338000 | 1.24408000  | C | -4.86447900 | -2.74295800 | -0.82196400 |
| H | 5.48922200  | 0.56153000  | 1.43977800  | C | -4.64185500 | -3.54023400 | 0.28844800  |
| C | 3.29159100  | -1.86610100 | 2.59418600  | H | -3.79045400 | -3.63540600 | 2.24274900  |
| H | 3.82817300  | -2.68057000 | 2.10809100  | H | -5.45573400 | -3.13151800 | -1.64260700 |
| H | 3.56539800  | -1.87719000 | 3.65350400  | H | -5.04183200 | -4.54767700 | 0.32992200  |
| H | 2.22539500  | -2.07729000 | 2.51607200  | C | -4.76490400 | -0.61790600 | -2.12417000 |
| C | 1.07509100  | -0.31541700 | -2.36784000 | C | -6.24988800 | -0.20724900 | -2.02795000 |
| H | 2.03493800  | -0.81183000 | -2.28386000 | C | -4.50529500 | -1.33654800 | -3.46080100 |
| H | 0.54905400  | -0.70807300 | -3.24042800 | H | -4.15538800 | 0.28013800  | -2.12922300 |
| H | 1.26129200  | 0.74702300  | -2.53365700 | H | -6.47281800 | 0.31120800  | -1.09219800 |
| C | 0.00424700  | -2.05841400 | -0.85113700 | H | -6.51652100 | 0.45639100  | -2.85661500 |
| H | 0.94613900  | -2.48530700 | -0.51117900 | H | -6.90296800 | -1.08366400 | -2.08078000 |
| H | -0.74751400 | -2.22900400 | -0.07824300 | H | -3.46675200 | -1.65520100 | -3.54071600 |
| H | -0.31779900 | -2.57217100 | -1.76013500 | H | -5.15242900 | -2.20939600 | -3.58702100 |
| C | -1.19520900 | -0.00087700 | -1.48809100 | H | -4.71247600 | -0.65618900 | -4.29233300 |
| O | -1.75996900 | -0.22629800 | -2.52819000 | C | -2.73534000 | -1.19899500 | 2.59338700  |
| C | 3.70768800  | -0.20715000 | -0.55720000 | C | -1.80105800 | -2.22042200 | 3.26379700  |
| C | 4.08725600  | 1.04734600  | -1.10857100 | C | -3.80628900 | -0.73421200 | 3.60285700  |
| C | 4.19526600  | -1.39881400 | -1.16721800 | H | -2.14092200 | -0.33414700 | 2.30508000  |
| C | 4.93008100  | 1.07896300  | -2.22323900 | H | -1.03576700 | -2.58075200 | 2.57233600  |
| C | 5.05713000  | -1.30367900 | -2.26469300 | H | -1.29680400 | -1.76382600 | 4.11822900  |
| C | 5.42834600  | -0.08006700 | -2.79724900 | H | -2.34835900 | -3.08804800 | 3.64189500  |
| H | 5.21973500  | 2.03832800  | -2.63700700 | H | -4.47746800 | 0.00938700  | 3.16793200  |
| H | 5.43237100  | -2.21294600 | -2.72058700 | H | -4.41901900 | -1.57750300 | 3.93640400  |
| H | 6.09426300  | -0.02965600 | -3.65162900 | H | -3.33543100 | -0.28968800 | 4.48518500  |
| C | 3.64776100  | 2.39223300  | -0.53877800 |   |             |             |             |
